# Supplementary material for: Fluid-Attenuated Inversion Recovery Sequence with Fat Suppression for Assessment of Ankle Synovitis without Contrast Enhancement: Comparison with Contrast-Enhanced MRI
Source: MDPI journal article supplement (doi:10.3390/diagnostics13111960), 2023-06-04
Supplement: s1 [file s1]

**Supplemental Table S1.** Mean signal intensity of the joint fluid with different inversion time

| Inversion time | Signal intensity of the joint fluid |
|----------------|-------------------------------------|
| 2000 ms        | $31.8 \pm 11.6$                     |
| 2100 ms        | $17.8 \pm 9.2$                      |
| 2200 ms        | $34.5 \pm 11.0$                     |

Data are presented as mean  $\pm$  standard deviation. To determine the optimal inversion time for FLAIR-FS, which effectively nulls joint fluid signals, several test scans were performed using inversion times between 2000 and 2200 ms. Consequently, an inversion time of 2100 ms was selected.
